# Supplementary material for: Inhibition of c-MYC with involvement of ERK/JNK/MAPK and AKT pathways as a novel mechanism for shikonin and its derivatives in killing leukemia cells
Source: PubMed Central journal article supplement (PMC4770748; doi:10.18632/oncotarget.5380), 2015-10-09
Supplement: oncotarget-06-38934-s001.pdf [file oncotarget-06-38934-s001.pdf]

**SUPPLEMENTARY TABLE****Supplementary Table S1: Go enrichment analysis of 91 commonly deregulated genes by shikonin and its derivatives after 24 h in U937 cells**

| Go category        | Go term                                      | Gene count | P-value  | Gene involved                                                                                                                                                                 |
|--------------------|----------------------------------------------|------------|----------|-------------------------------------------------------------------------------------------------------------------------------------------------------------------------------|
| Biological process | cell cycle process                           | 10         | 6.01E-03 | NOLC1, CCND2, RASSF1, PSMC1, RRS1, RUVBL1, DYNC1H1, PPP1R15A, GADD45A, MYC                                                                                                    |
|                    | cell death                                   | 10         | 2.57E-02 | IER3, AIMP2, HMOX1, JUN, TNFAIP8, LGALS12, PPP1R15A, GADD45A, MYC, DDIT4                                                                                                      |
|                    | death                                        | 10         | 2.67E-02 | IER3, AIMP2, HMOX1, JUN, TNFAIP8, LGALS12, PPP1R15A, GADD45A, MYC, DDIT4                                                                                                      |
|                    | cell cycle                                   | 10         | 3.91E-02 | NOLC1, CCND2, RASSF1, PSMC1, RRS1, RUVBL1, DYNC1H1, PPP1R15A, GADD45A, MYC                                                                                                    |
|                    | ncRNA metabolic process                      | 9          | 6.25E-05 | NOP2, NOLC1, PUS1, METTL1, TFB2M, MARS2, TFB1M, GEMIN4, DTD1                                                                                                                  |
|                    | apoptosis                                    | 9          | 2.56E-02 | IER3, AIMP2, JUN, TNFAIP8, LGALS12, PPP1R15A, GADD45A, MYC, DDIT4                                                                                                             |
|                    | programmed cell death                        | 9          | 2.76E-02 | IER3, AIMP2, JUN, TNFAIP8, LGALS12, PPP1R15A, GADD45A, MYC, DDIT4                                                                                                             |
|                    | macromolecular complex assembly              | 9          | 4.24E-02 | CYBA, HIST1H4A, NIP7, ADSL, TNPO1, PDSS1, MYC, DCTPP1, GEMIN4                                                                                                                 |
| Cellular component | intracellular non-membrane-bounded organelle | 24         | 1.33E-02 | GABARAPL1, NHP2L1, NIP7, PRMT3, MRPL24, NOP2, NOLC1, HIST1H4A, HMOX1, JUN, RASSF1, MRPL17, PSMC1, SNTB2, RRS1, TFB2M, CNN2, DDX21, RUVBL1, DYNC1H1, TFB1M, MYC, APEX1, GEMIN4 |
|                    | non-membrane-bounded organelle               | 24         | 1.33E-02 | GABARAPL1, NHP2L1, NIP7, PRMT3, MRPL24, NOP2, NOLC1, HIST1H4A, HMOX1, JUN, RASSF1, MRPL17, PSMC1, SNTB2, RRS1, TFB2M, CNN2, DDX21, RUVBL1, DYNC1H1, TFB1M, MYC, APEX1, GEMIN4 |
|                    | membrane-enclosed lumen                      | 21         | 2.53E-03 | PHACTR3, NHP2L1, NIP7, TIMM8A, DTD1, NOP2, NOLC1, HIST1H4A, HMOX1, JUN, PSMC1, MARS2, RRS1, TFB2M, DDX21, RUVBL1, TFB1M, MYB, MYC, APEX1, GEMIN4                              |
|                    | intracellular organelle lumen                | 20         | 3.70E-03 | PHACTR3, NHP2L1, NIP7, DTD1, NOP2, NOLC1, HIST1H4A, HMOX1, JUN, PSMC1, MARS2, RRS1, TFB2M, DDX21, RUVBL1, TFB1M, MYB, MYC, APEX1, GEMIN4                                      |
|                    | organelle lumen                              | 20         | 4.77E-03 | PHACTR3, NHP2L1, NIP7, DTD1, NOP2, NOLC1, HIST1H4A, HMOX1, JUN, PSMC1, MARS2, RRS1, TFB2M, DDX21, RUVBL1, TFB1M, MYB, MYC, APEX1, GEMIN4                                      |
|                    | nuclear lumen                                | 16         | 1.39E-02 | PHACTR3, NHP2L1, NIP7, NOP2, NOLC1, HIST1H4A, HMOX1, JUN, PSMC1, RRS1, DDX21, RUVBL1, MYB, APEX1, MYC, GEMIN4                                                                 |

(Continued)

| Go category        | Go term                                           | Gene count | P-value  | Gene involved                                                                                                    |
|--------------------|---------------------------------------------------|------------|----------|------------------------------------------------------------------------------------------------------------------|
|                    | mitochondrion                                     | 15         | 2.65E-03 | LGALS12, SFXN4, TIMM8A, MSRB3, DTD1, MTHFD1, MRPL24, CYBA, COQ2, MRPL17, SLC25A22, MARS2, SLC25A19, TFB2M, TFB1M |
|                    | nucleolus                                         | 9          | 4.19E-02 | NOP2, NOLC1, NHP2L1, NIP7, HMOX1, PSMC1, RRS1, DDX21, GEMIN4                                                     |
| Molecular function | RNA methyltransferase activity                    | 3          | 7.06E-03 | METTL1, TFB2M, TFB1M                                                                                             |
|                    | endoribonuclease activity                         | 3          | 3.01E-02 | RNASE2, RNASE3, APEX1                                                                                            |
|                    | transferase activity                              | 3          | 3.25E-02 | COQ2, SRM, PDSS1                                                                                                 |
|                    | N-methyltransferase activity                      | 3          | 3.75E-02 | PRMT3, TFB2M, TFB1M                                                                                              |
|                    | rRNA methyltransferase activity                   | 2          | 2.29E-02 | TFB2M, TFB1M                                                                                                     |
|                    | rRNA (adenine) methyltransferase activity         | 2          | 2.29E-02 | TFB2M, TFB1M                                                                                                     |
|                    | rRNA (adenine-N6,N6)-dimethyltransferase activity | 2          | 2.29E-02 | TFB2M, TFB1M                                                                                                     |
|                    | phospholipase D activity                          | 2          | 3.98E-02 | PLD6, HMOX1                                                                                                      |
